# Supplementary material
Source: PubMed Central journal article supplement (PMC2393764)
Supplement: pnas_0800276105_3.pdf [file pnas_0800276105_3.pdf]

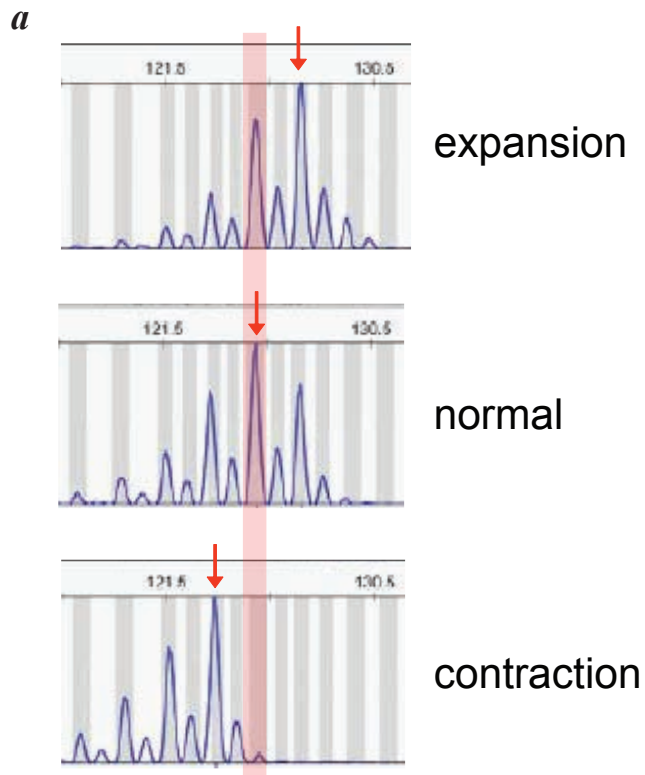

**b**

| Genotype                     | Frequency      |                           |
|------------------------------|----------------|---------------------------|
| WT                           | 6.6% (15/229)  |                           |
| <i>Mlh1</i> <sup>-/-</sup>   | 25.4% (48/189) | p<0.0001 (compared to WT) |
| <i>Mlh1</i> <sup>GR/GR</sup> | 21.9% (50/228) | p<0.0001 (compared to WT) |

**c**

| Genotype                     | Frequency     |                           |
|------------------------------|---------------|---------------------------|
| WT                           | 4.2% (2/48)   |                           |
| <i>Mlh1</i> <sup>-/-</sup>   | 24.0% (23/96) | p<0.0001 (compared to WT) |
| <i>Mlh1</i> <sup>GR/GR</sup> | 23.4% (22/94) | p<0.0001 (compared to WT) |
