# Supplementary material
Source: PubMed Central journal article supplement (PMC2393764)

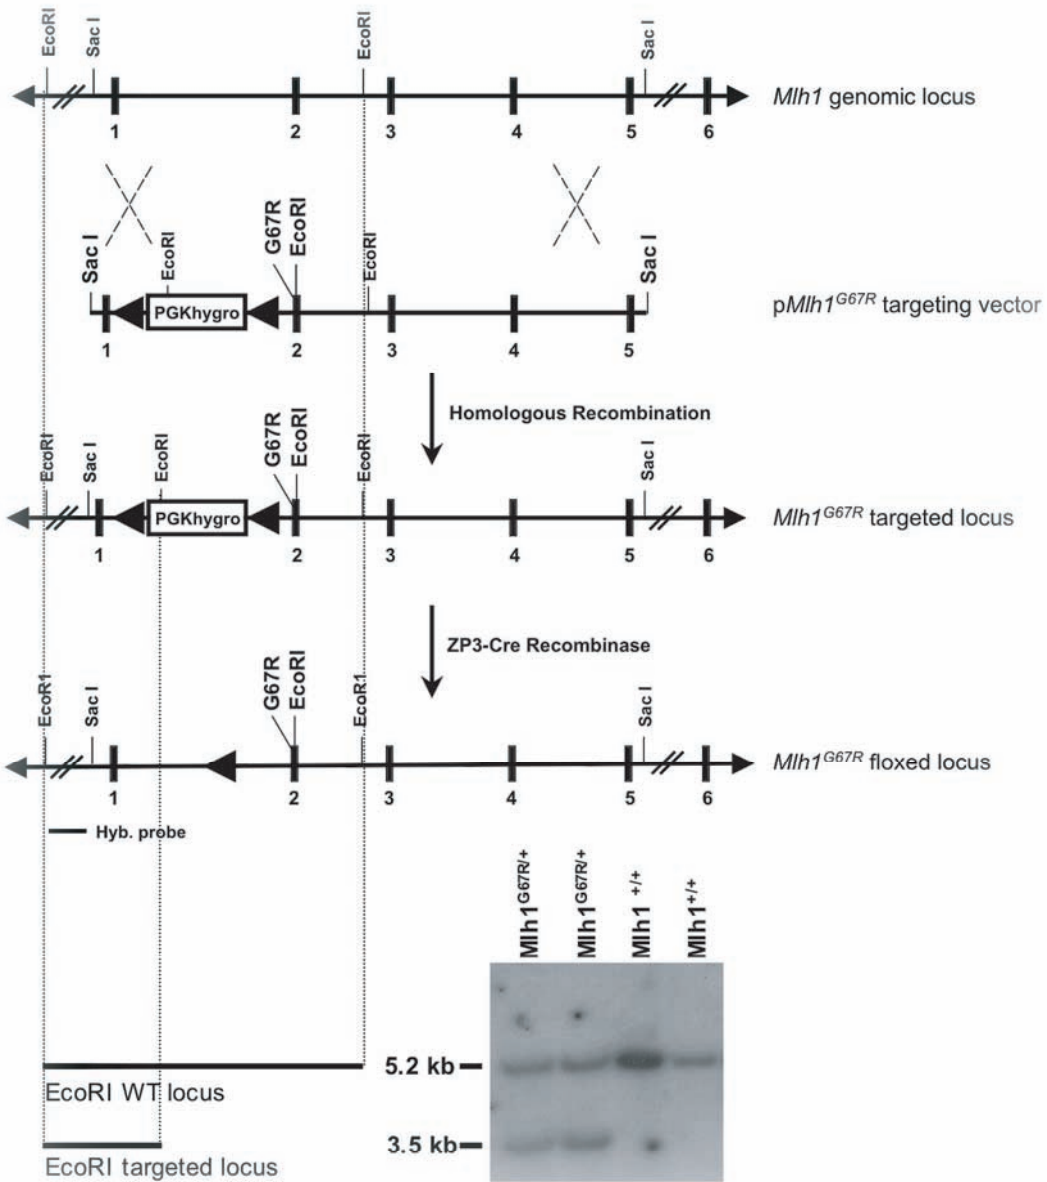

Supplement: pnas_0800276105_1.pdf [file pnas_0800276105_1.pdf]

*a*

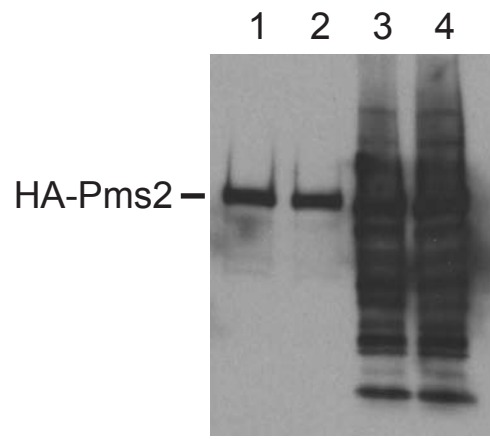

**WB: anti-HA**

Co-IP anti-Flag    Total lysate

*b*

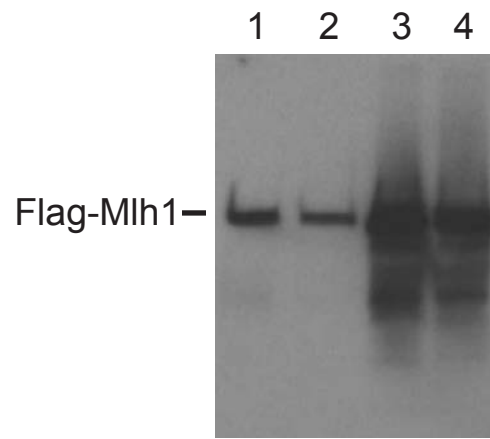

**WB: anti-Flag**

Co-IP anti-HA    Total lysate

Supplement: pnas_0800276105_2.pdf [file pnas_0800276105_2.pdf]

**a**

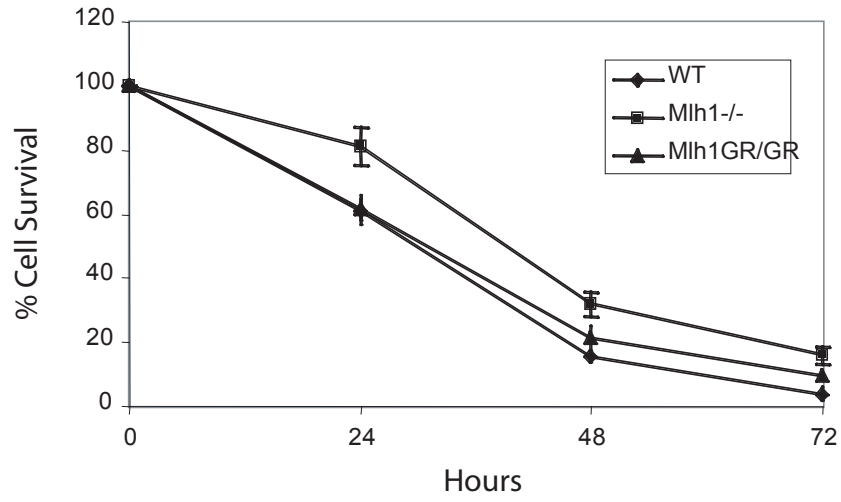

**b**

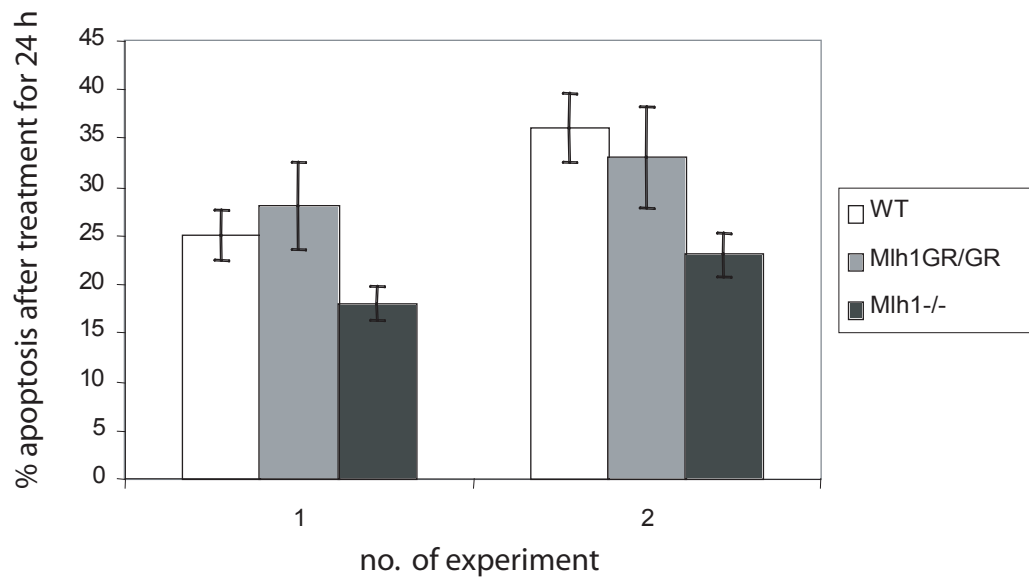

Supplement: pnas_0800276105_4.pdf [file pnas_0800276105_4.pdf]

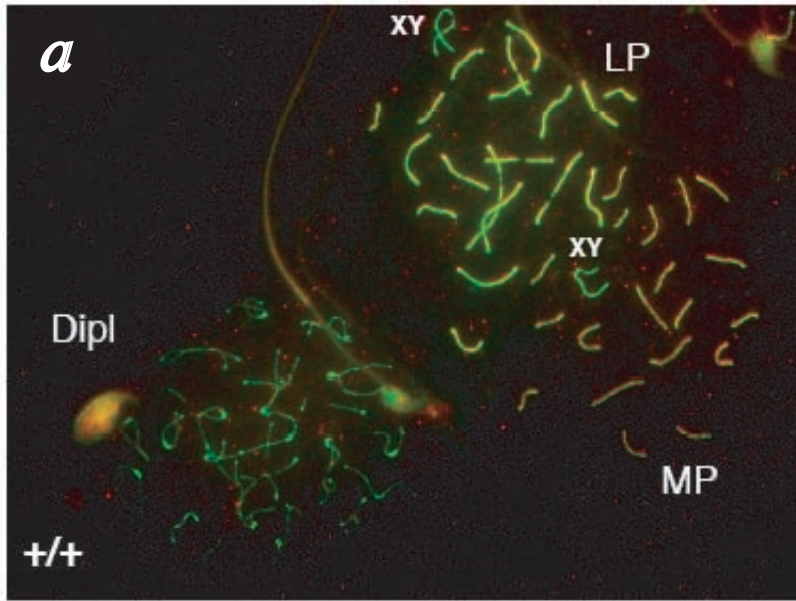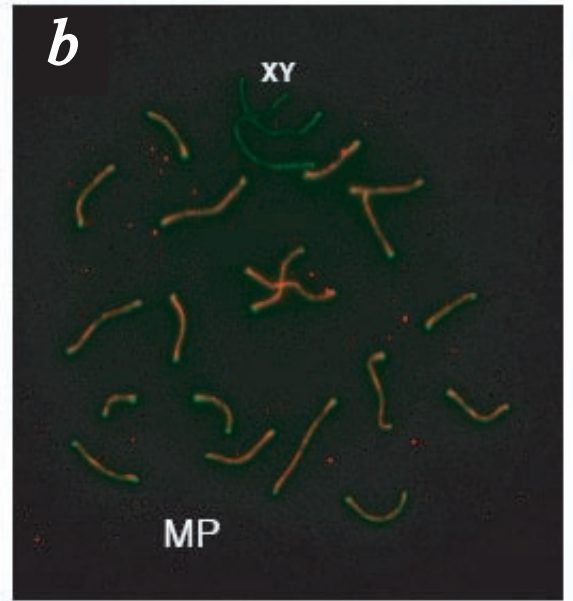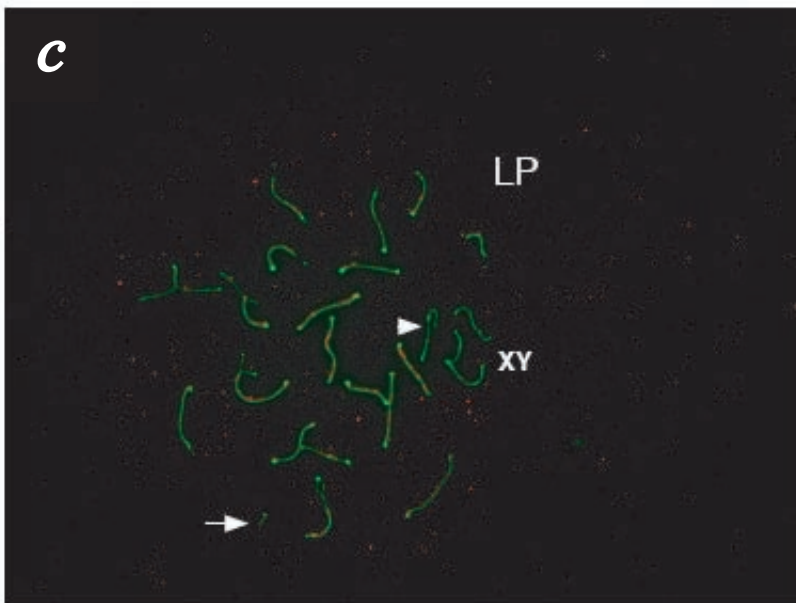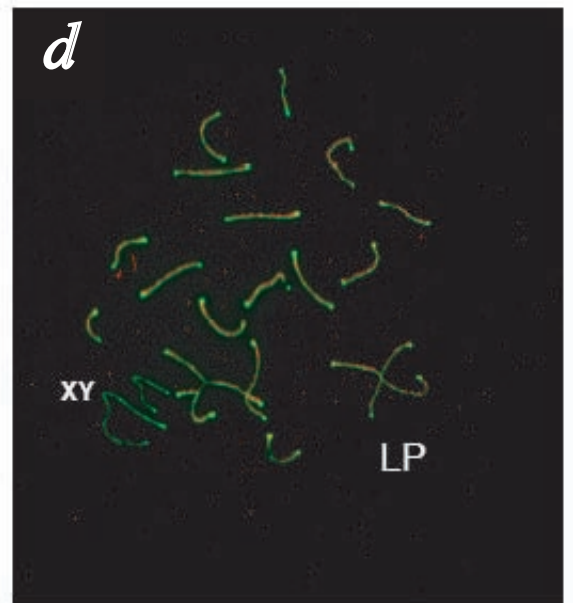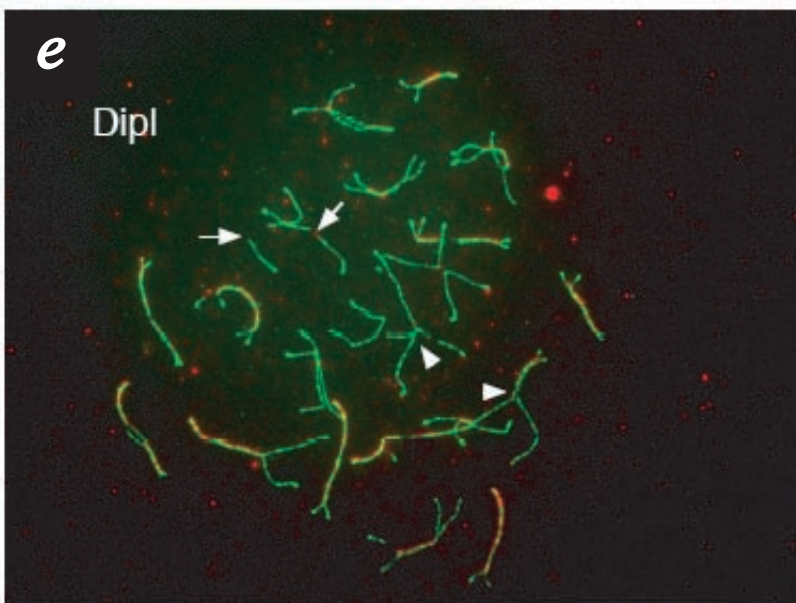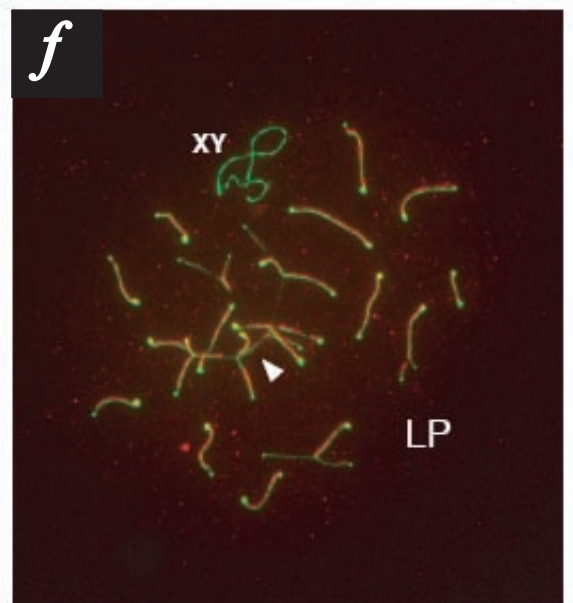

Supplement: pnas_0800276105_5.pdf [file pnas_0800276105_5.pdf]

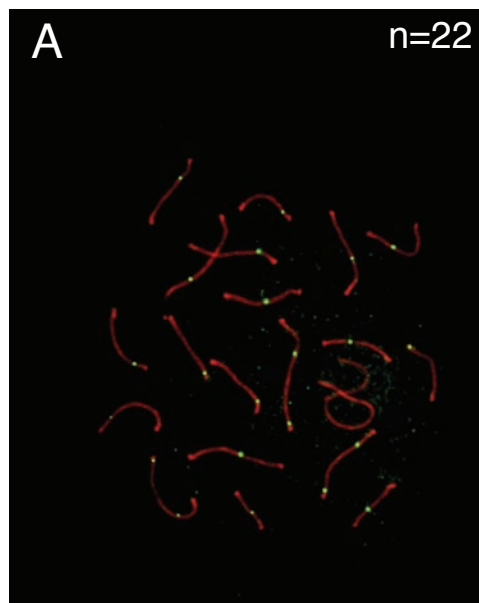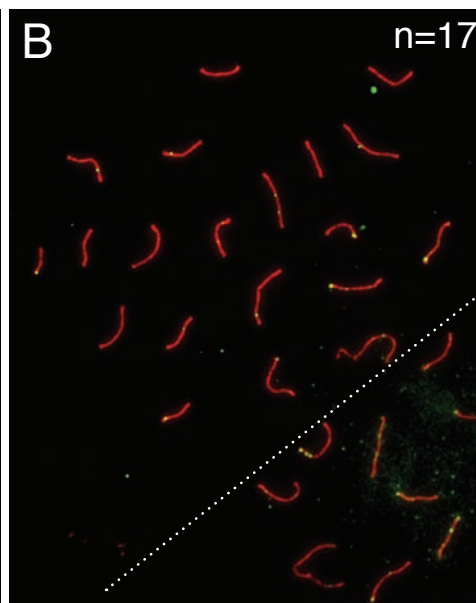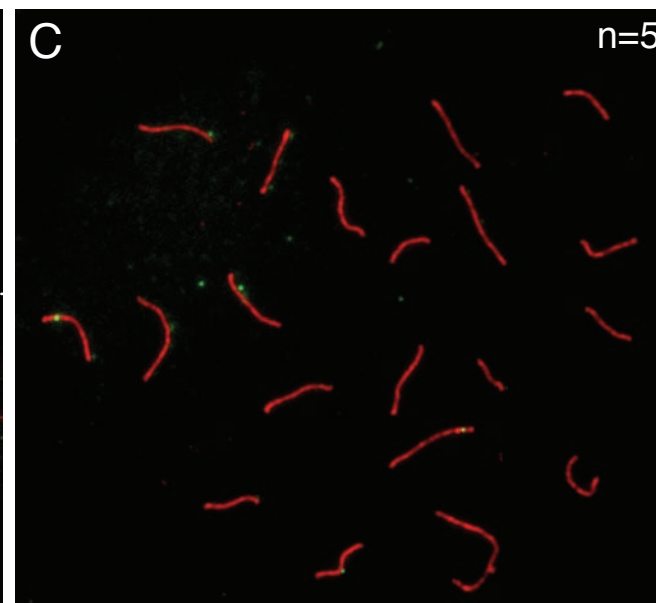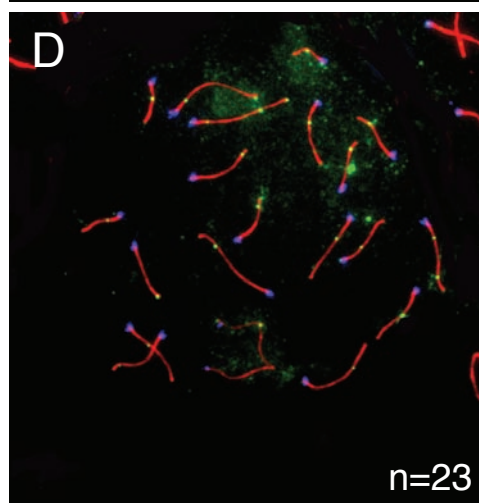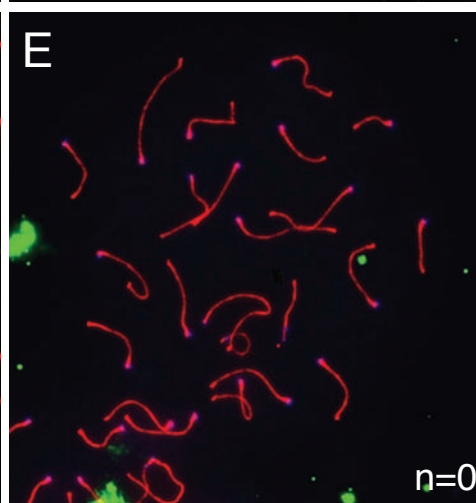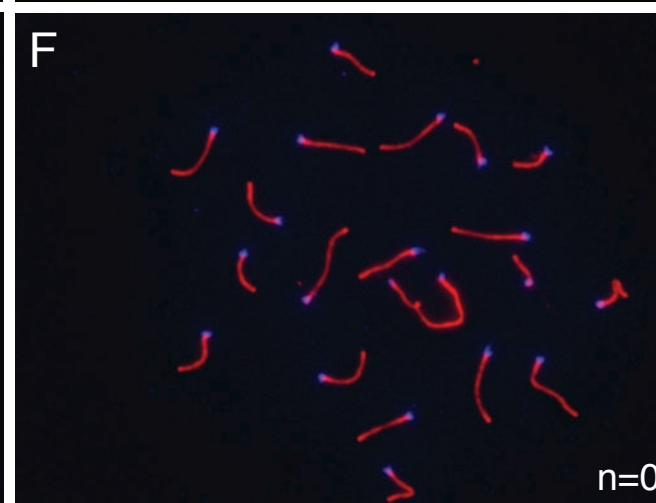

Supplement: pnas_0800276105_6.pdf [file pnas_0800276105_6.pdf]
